# Supplementary material for: Brain mechanism of unfamiliar and familiar voice processing: an activation likelihood estimation meta-analysis
Source: PeerJ. 2023 Mar 13;11:e14976. doi: 10.7717/peerj.14976 (PMC10019337; doi:10.7717/peerj.14976)
Supplement: Supplemental Information 1 [file peerj-11-14976-s001.xlsx]

## Sheet: Sheet1
The research type	The article	Raw coordinate data (TAL)			Subjects
		X	Y	Z
voice identity identification (VII)	Aglieri et al. 2021	52.71	-5.25	-0.73	40
		-54.68	-6.9	0.9
		-28.75	18.7	7.36
		10.06	-29.42	-1.94
		-5.28	5.08	49.71
		-35.11	-23.76	57.28
		26.8	20.45	6.67
		-26.79	-55.44	-23.05
		-6.79	-85.58	-3.95
		37.61	12.71	27.74
		-38.35	1.58	29
		33.38	-18.53	58.94
		-44.24	-39.26	43.05
		29.69	-58.63	46.07
		-46.06	-18.93	46.75
		-54.77	-13.02	5.72
		52.65	-11.19	2.31
		-40.12	14.98	26.64
	Andics et al. 2013	39.38	10.31	32.95	15
		42.99	2.32	37.65
	Birkett et al. 2007	-55	-8	-13	11
	Hasan et al. 2016	-41.96	-61.7	3.13	5
		-54.74	-29.26	-1.22
		54.6	-26.92	-9.96
		48.93	-29.63	-1.31
		-51.06	-55.02	-7.2
		-51.05	-33.01	-1.52
		49.19	-0.28	-12.93
		-47.32	12.86	10.1
		-50.84	-5.88	-9.75
		-54.95	-56.39	7.01
		43.33	-64.65	-8.32
		59.91	-39.7	5.13
		58.19	-24.08	-0.62
	Holig et al. 2017	46.95	22.5	23.42	18
		48.86	26.57	20.23
		-51.15	19.28	21.45
	Joassin et al. 2011	56.29	-26.29	2.74	14
		-49.29	-31.85	5.83
		32.09	34.92	31.55
		-32.63	30.19	24.6
		-14.26	-93.34	-1.2
	Latinus et al. 2011	-12.63	2.76	44.86	16
		40.37	-3.81	23.52
		40.6	27.98	15.72
		34.66	0.5	37.34
	Ogg et al. 2019	-43.3	-22.64	12.29	18
		-60.95	-20.35	-3.07
		63.52	-12.83	-0.13
	Shah et al. 2001	64	-8	-6	10
		-62	-10	-4
		44	-28	10
		-42	-32	8
		60	16	16
		-50	14	16
	Kriegstein & Giraud 2004	-27	-51	-21	9
		36	-39	-12
		18	-51	66
		-18	-39	45
		15	-15	42
		24	-9	66
		-15	-6	69
		33	-21	45
		-48	-72	15
	Kriegstein et al. 2005	60	-3	-30	9
		51	15	-30
		54	-60	18
		42	-45	-24
		27	9	-24
		24	-15	-15
		-60	-3	-24
		-63	-18	-21
		-54	3	-33
		-39	-60	18
		-54	-69	18
		-36	-45	-30
		-30	0	-21
		6	-57	21
voice identity recognition(VIR)	Andics et al. 2010	45.27	-20.12	-2.27	24
		-40.03	-37.31	3.67
		-29.18	-57.57	18.15
		43.77	17.21	-18.58
		-50.69	9.9	-17.26
		-28.55	-1.74	-14.39
		-29.21	-61.47	19.58
		43.77	17.21	-18.58
		-48.78	13.96	-20.45
		-19.34	-7.56	-12.98
	Belin & Zatorre 2003	58	2	-8	14
	Bonte et al. 2014	-59	-28	8	10
		47	-22	1
		-51	-15	6
		54	-16	9
		57	-4	0
		-39	-4	-10
	Mathiak et al. 2007	35.98	-33.11	-3.66	10
	Rämä et al. 2004	-55	-21	-2	14
		61	-21	1
		-34	-69	38
		31	-67	35
		5	-76	34
		-33	13	8
		46	11	0
		-44	8	30
		46	24	26
		-41	42	10
		1	8	51
		7	-80	-23
		-46	10	3
		42	12	-1
	Rämä & Courtney 2005	-54	-27	-1	12
		56	-22	-3
		-47	15	4
		51	-1	3
		47	15	25
		37	3	45
		3	24	45
		3	1	57
	Relander & Rämä 2009	-39	15	-1	10
		36	19	3
		-50	12	30
		50	16	29
		7	21	39
		-60	-15	-4
		52	-17	-1
		-35	-54	38
		40	-55	38
		-7	-73	-22
		9	76	22
		-37	15	-1
		34	20	2
		-42	7	27
		49	14	24
		1	26	32
		-50	-20	7
		48	-19	-2
	Stevens 2004	4	-72	32	9
		-1	59	32
		14	63	5
		37	14	32
		50	22	32
		50	-66	23
		-60	-41	5
		-51	-11	-5
		61	-12	5
		45	-40	5
		-17	-8	-5
		18	-7	-5
		51	-68	32
		-4	-63	23
		15	60	23
		45	26	23
		49	-72	32
		50	18	32
		-46	-1	-5
	von et al. 2003	-63	-15	-3	14
		-60	-9	-15
		-54	6	-27
		63	-6	-12
		57	3	-27
		57	9	-21
		36	-87	9
		12	-51	36
		3	-57	33
		54	12	-15
		-12	-57	36
	Zäske et al. 2017	46.84	14.35	29.85	22
		-15.89	10.66	12.22
		59.97	-19.2	7.08
		2.09	12.14	54.11
	Zhang et al. 2016	-65	-32	7	18
		-13	-65	-16
		66	-23	7
voice identity perception(VIP)	Agus et al. 2017	54.5	-13.99	2.07	22
		-59.44	-27.9	4.23
	Belin et al. 2000	58	6	-10	6
		60	-1	-4
		63	-13	-1
		52	-19	-1
		56	-30	6
		46	-44	6
		4	-52	30
		-60	-2	-9
		-62	-14	0
		-40	-37	13
		-62	-40	10
	Fecteau et al. 2004	60	-24	-8	15
		52	8	-24
		60	-14	-10
		-58	-10	-12
		-64	-24	-10
		-66	-32	0
	Fecteau et al. 2005	-42	26	-10	15
	Latinus et al. 2013	-56.64	-26.89	3.47	48
		-56.64	-13.18	7.48
		-56.56	-7.07	2.65
		57.26	-24.17	0.25
		51.65	-32.78	2.05
		43.63	7.96	-10.45
	Lee et al. 2016	57.49	-14.21	-15.01	12
		-53.6	2.52	-9
	Pernet et al. 2015	-56.6	-12.83	3.91	218
		-58.5	-22.31	4.78
		-52.72	1.24	-5.51
		54.47	-15.1	3.77
		54.44	-26.28	2.71
		54.55	-1.71	1.43
		-47.85	-11.12	43.85
		-37.95	24.68	4.17
		17.61	-8.27	-7.02
		23.25	-0.32	-11.58
		-43.84	9.41	26.05
		9.96	-15.56	10.18
		11.81	-6.43	12.88
		6.35	-5.71	5.65
		11.94	-25.53	-3.34
		4.45	-31.61	1.36
		-13.97	-25.4	-3.77
	Roswandowitz et al. 2021	-56.55	-10.62	0.51	29
		-59.35	-21.79	-0.59
		-36.08	29.33	4.64
		-45.68	14.07	26.46
		53.49	-30.08	3.23
		55.48	-1.71	1.45
		44.07	11.66	28.65
		39.82	27.25	3.93
		8.44	-74.31	-33.25
	Warren et al. 2006	52.33	-37.32	19.64	12
		56.5	-6.43	-7.99
		45.09	-37.93	6.85
		54.44	-17.13	5.38
		-60.27	-18.05	-0.25
		-62.14	-27.36	-1.17
	Waston et al. 2014	51.74	-19.31	-1.18	40
		-56.47	-10.1	-4.84
		1.29	-58.25	24
